# Supplementary material
Source: publisher site journal article supplement (https://content.cld.iop.org/journals/1748-9326/8/4/044045/revision1/erl486747suppdata.pdf)
Supplement: Supplementary file 1 [file erl486747suppdata.pdf]

## Supplementary information

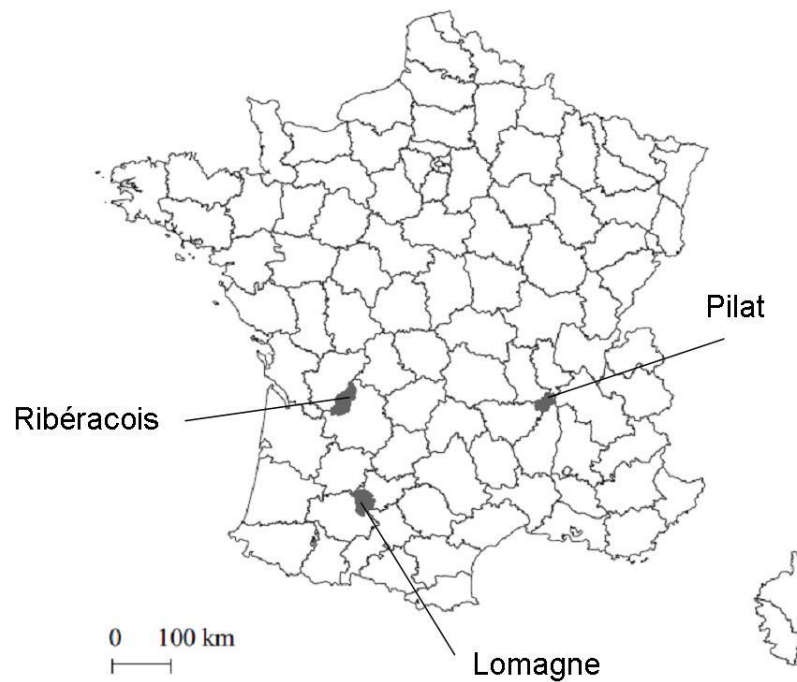

**Supplementary figure 1** Geographical location of the study areas.

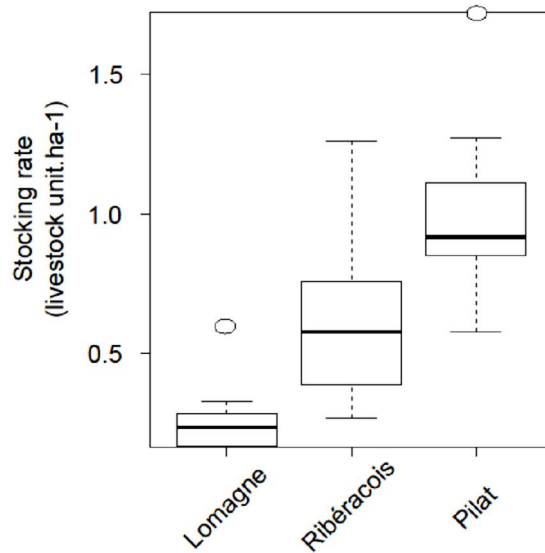

**Supplementary figure 2** Stocking rate of the sampled organic livestock farms (n=7, 14 and 20 in Lomagne, Ribéracois and Pilat, respectively). From the bottom to the top, horizontal black lines refer to the first decile, first quartile, median, third quartile and ninth decile. Open black circles refer to outliers.

**Supplementary table 1** Characteristics of the three study areas.

| Agricultural districts                                                                                      | Lomagne                                   | Ribéracois             | Pilat                |      |
|-------------------------------------------------------------------------------------------------------------|-------------------------------------------|------------------------|----------------------|------|
| Latitude/Longitude                                                                                          | 43° 53' N / 0° 46' E                      | 45° 14' N / 0° 20' E   | 45° 20' N / 4° 25' E |      |
| Area                                                                                                        | 935 km <sup>2</sup>                       | 1021 km <sup>2</sup>   | 520 km <sup>2</sup>  |      |
| Agricultural area                                                                                           | 720 km <sup>2</sup>                       | 505 km <sup>2</sup>    | 173 km <sup>2</sup>  |      |
| Annual mean temperature                                                                                     | 12.7°C                                    | 12.6°C                 | 10.1 °C              |      |
| Cumulative annual rainfall                                                                                  | 600 mm                                    | 812 mm                 | 1000 mm              |      |
| Altitude                                                                                                    | 57-278 m asl                              | 43 ó 210 m asl         | 140 ó 1432 m asl     |      |
| Main soils                                                                                                  | Deep to superficial calcareous-clay soils | Calcareous loamy soils | Acid clay soils      |      |
| Total stocking rate, organic and conventional farming combined (livestock unit per ha of agricultural area) | 0.20                                      | 0.64                   | 1.15                 |      |
| % of the agricultural area, organic and conventional farming combined, under                                | Cereal, oilseed and protein crops         | 79 %                   | 55 %                 | 10 % |
|                                                                                                             | Grasslands and other fodders              | 9 %                    | 40 %                 | 86 % |
|                                                                                                             | Other (e.g., horticultural crops)         | 12 %                   | 5 %                  | 4 %  |
| % of organic farms out of the total number of farms                                                         | 5.2 %                                     | 5.1 %                  | 3.9 %                |      |

*Figures related to general agricultural production, organic farming and conventional farming combined were taken from the 2010 French agricultural census (Agreste n.d.). Figures related to organic farms were taken from the French organic farmers book (AgenceBio n.d.).*

**Supplementary table 2** Characteristics of the sampled organic farms.

| Agricultural districts                                                         | Lomagne   | Ribéracois | Pilat     |
|--------------------------------------------------------------------------------|-----------|------------|-----------|
| Number of organic farms                                                        | 25        | 17         | 21        |
| <i>Arable farms</i>                                                            | <i>17</i> | <i>3</i>   | <i>0</i>  |
| <i>Horticulture farms</i>                                                      | <i>1</i>  | <i>0</i>   | <i>1</i>  |
| <i>Of which, # of</i>                                                          |           |            |           |
| <i>Beef/sheep farms</i>                                                        | <i>4</i>  | <i>7</i>   | <i>0</i>  |
| <i>Dairy farms</i>                                                             | <i>0</i>  | <i>6</i>   | <i>18</i> |
| <i>Poultry farms</i>                                                           | <i>3</i>  | <i>1</i>   | <i>2</i>  |
| Stocking rate of organic farms<br>(livestock unit per ha of agricultural area) | 0.07      | 0.60       | 0.93      |
| % of the area under                                                            |           |            |           |
| Cereal, oilseed and protein crops                                              | 86        | 17         | 11        |
| Grasslands and other fodders                                                   | 12        | 82         | 87        |
| Other (e.g., horticultural crops)                                              | 1         | 1          | 2         |
